# Supplementary material for: Quality of Reporting in Preclinical Urethral Tissue Engineering Studies: A Systematic Review to Assess Adherence to the ARRIVE Guidelines
Source: MDPI journal article supplement (doi:10.3390/ani11082456), 2021-08-21
Supplement: s1 [file s1]

**Supplementary Table S2.**

Summary of the main aspects of the analyzed studies. Abbreviations: BAMG = Bladder acellular matrix graft, PLA = polylactic acid, PLLA/PEG = Poly-L-lactic acid/ Poly(ethylene glycol), SIS = Small intestinal submucosa, P(LA/CL) = Poly(lactide-co-caprolactone), NZW = New Zealand white, NM = Not mentioned, M= Male, F = Female, PLCL/PTMC = Poly(l-lactide-co- $\epsilon$ -caprolactone) and Poly(trimethylene carbonate).

| N o. | Author          | Year | Ref. | Strain | Sex | Age (Months) | Wt. (Kg) | Number of Animals | Graft approach (defect length in mm) | Graft Material                                     | Follow up Duration (months) |
|------|-----------------|------|------|--------|-----|--------------|----------|-------------------|--------------------------------------|----------------------------------------------------|-----------------------------|
| 1.   | Huang J-W       | 2014 | [34] | NZW    | M   | NM           | 2        | 30                | Patch (15)                           | BAM, rabbit                                        | 3                           |
| 2.   | Li H            | 2014 | [35] | NZW    | M   | NM           | NM       | 36                | Patch (20)                           | BAM, rabbit                                        | 6                           |
| 3.   | Wang F          | 2014 | [36] | NZW    | M   | NM           | NM       | 12                | Patch (10)                           | Denuded amniotic scaffold, human                   | 3                           |
| 4.   | Kajbafzadeh A-M | 2014 | [37] | NM     | M   | NM           | NM       | 12                | Patch (5)                            | Preputial acellular matrix, human                  | 3                           |
| 5.   | Sun D           | 2014 | [38] | NZW    | M   | NM           | NM       | 28                | Patch (5)                            | Subcutaneous implanted<br><br>Human umbilical cord | 3                           |

|     |            |       |      |                               |         |    |         |    |            |                                                  |     |
|-----|------------|-------|------|-------------------------------|---------|----|---------|----|------------|--------------------------------------------------|-----|
| 6.  | Xu Y       | 2014  | [39] | NZ                            | M+<br>F | 8  | NM      | 21 | Patch (5)  | Subcutaneous<br>implanted muscle<br>microsomes   | 1   |
| 7.  | A Da Silva | 2014  | [40] | NZW                           | M       | NM | NM      | 16 | Tube (10)  | Collagen, porcine                                | 3   |
| 8.  | Chun SY    | 2015  | [41] | NZW                           | M       | NM | NM      | 20 | Patch (20) | BAM, porcine                                     | 6   |
| 9.  | Guo H      | 2016  | [42] | NZW                           | M       | NM | 1.5-2.0 | 24 | Patch (20) | SIS, porcine                                     | 6   |
| 10. | Huang J-W  | 2015  | [43] | NZW                           | M       | NM | 2-2.5   | 30 | Patch (20) | Cellulose, bacterial                             | 3   |
| 11. | Zhang K    | 2015  | [44] | NZW                           | M       | NM | NM      | 12 | Patch (20) | P(LA/CL) +<br>collagen (source not<br>mentioned) | 0.5 |
| 12. | Wang DJ    | 2015  | [45] | NZW                           | M       | 3  | 2-2.5   | 24 | Patch (10) | PLA                                              | 1.5 |
| 13. | Rogovaya O | 2015  | [46] | Chinch<br>ilia<br>Rabbit<br>s | M       | NM | 2       | 20 | Tube (15)  | Keratinocyte living<br>skin equivalent           | 3   |
| 14. | Lv X       | 2016a | [47] | NZW                           | M       | NM | NM      | 18 | Patch (15) | Keratin/silk fibroin                             | 6   |
| 15. | Lv X       | 2016b | [48] | NZW                           | M       | 3  | 2.5-3   | 27 | Patch (20) | PLLA/PEG                                         | 3   |

|     |              |      |      |     |   |               |         |    |                     |                                                           |   |
|-----|--------------|------|------|-----|---|---------------|---------|----|---------------------|-----------------------------------------------------------|---|
| 16. | Pinnagoda K  | 2016 | [49] | NZW | M | NM            | 2.5–3.5 | 20 | Tube (20)           | Collagen, porcine                                         | 9 |
| 17. | Gunes M      | 2016 | [50] | NZW | M | 2             | 2.5-3   | 12 | Patch (10)          | Buccal Mucosa and Amniotic Membrane, rabbit               | 2 |
| 18. | Nikolavsky D | 2016 | [51] | NZW | M | Post pubertal | 2.8-3.4 | 16 | Patch “liquid” (10) | Liquid Buccal Mucosal Graft, rabbit                       | 6 |
| 19. | Yang Liu     | 2017 | [52] | NZW | M | NM            | 2.0–2.5 | 24 | Patch (20)          | SIS, porcine                                              | 3 |
| 20. | Jiang S      | 2017 | [53] | NZW | M | 6-8           | 2.5–4   | 18 | Tube (15)           | Mesothelial Cell-Seeded Autogenous Granulation Tissue     | 6 |
| 21. | Larsson, HM  | 2018 | [54] | NZW | M | NM            | 2.5–3.5 | 7  | Tube (20)           | Collagen, bovine                                          | 6 |
| 22. | Algarrahi K  | 2018 | [55] | NZW | M | NM            | 3-3.5   | 12 | Patch (10)          | Silk Fibroin                                              | 3 |
| 23. | Sa, Y        | 2018 | [56] | NZW | M | NM            | 1.5-2   | 20 | Patch (20)          | Bladder acellular matrix graft BAMG, source not mentioned | 5 |
| 24. | Sartoneva R  | 2018 | [57] | NZW | M | NM            | NM      | 34 | Patch (20)          | PLCL/PTMC                                                 | 4 |

|     |             |      |      |     |   |       |                      |    |            |                                                                                     |    |
|-----|-------------|------|------|-----|---|-------|----------------------|----|------------|-------------------------------------------------------------------------------------|----|
| 25. | Pusateri CR | 2019 | [58] | NZW | M | 5     | 3.2<br>(2.8–<br>3.5) | 10 | Patch (15) | Decellularized<br>Placental<br>Membrane, human                                      | 12 |
| 26. | Guo H-L     | 2019 | [59] | NZW | M | NM    | 2.5-3                | 30 | Tube (15)  | prevascularized<br>capsular tissue<br>prelaminated with<br>buccal mucosa,<br>rabbit | 12 |
| 27. | Hua X       | 2019 | [60] | NZ  | M | Adult | 2.5-3.0              | 30 | Patch (20) | Tunica Vaginalis,<br>rabbit                                                         | 6  |
| 28. | Li Y        | 2017 | [61] | NZW | M | MN    | 2-2.5                | 10 | Tube (30)  | Collagen, rabbit                                                                    | 2  |
