# Supplementary material for: Quality of Reporting in Preclinical Urethral Tissue Engineering Studies: A Systematic Review to Assess Adherence to the ARRIVE Guidelines
Source: MDPI journal article supplement (doi:10.3390/ani11082456), 2021-08-21
Supplement: s1 [file s1]

**Supplementary Table S1:** Operationalized ARRIVE checklist for the assessment of the quality of reporting in urethral tissue engineering studies. The terms in arrive checklist were reformulated as questions (ARRIVE guidelines were published in PLOS biology under CC-BY license).

| No. | ARRIVE item      | Operational question                                                                                                                                                                                                                              | Answer |    |     |
|-----|------------------|---------------------------------------------------------------------------------------------------------------------------------------------------------------------------------------------------------------------------------------------------|--------|----|-----|
|     |                  |                                                                                                                                                                                                                                                   | Yes    | No | N/A |
| 1.  | 1. Title         | Is the description of the content of the article reported in an accurate and concise manner?                                                                                                                                                      |        |    |     |
| 2.  | 2. Abstract      | Is there a summary of the background <b>AND</b> research objectives <b>AND</b> details of the species or strain of animal used <b>AND</b> key methods <b>AND</b> principal findings <b>AND</b> conclusions of the study reported in the abstract? |        |    |     |
| 3.  | 3a. Background   | Is there a sufficient scientific background to explain the approach and rationale of the study?                                                                                                                                                   |        |    |     |
| 4.  | 3b. Background   | Is there any explanation on how and why the specific animal model has been selected <b>OR</b> the study's relevance to human biology?                                                                                                             |        |    |     |
| 5.  | 4. Objective     | Are the objectives of the study <b>OR</b> the hypothesis being reported?                                                                                                                                                                          |        |    |     |
| 6.  | 5. Ethics        | Is there any disclosure of the ethical permissions <b>AND</b> the guidelines followed for care and use of animals?                                                                                                                                |        |    |     |
| 7.  | 6a. Study design | Is the number of the experimental <b>AND</b> control groups mentioned?                                                                                                                                                                            |        |    |     |

|     |                            |                                                                                                                                                                                                                                                                                                                         |  |  |  |
|-----|----------------------------|-------------------------------------------------------------------------------------------------------------------------------------------------------------------------------------------------------------------------------------------------------------------------------------------------------------------------|--|--|--|
|     |                            | (N/A= If no control group has been used)                                                                                                                                                                                                                                                                                |  |  |  |
| 8.  | 6b. Study design           | Is randomization <b>OR</b> blinding provided?<br><br>(N/A= If there is a single experimental group)                                                                                                                                                                                                                     |  |  |  |
| 9.  | 6c. Study design           | Is there an experimental unit reported?                                                                                                                                                                                                                                                                                 |  |  |  |
| 10. | 7a. Experimental Procedure | Was/were anesthesia <b>OR</b> analgesia <b>OR</b> surgical procedure <b>OR</b> method of euthanasia described?                                                                                                                                                                                                          |  |  |  |
| 11. | 7b. Experimental Procedure | Is the time (during the day) of the procedure reported?                                                                                                                                                                                                                                                                 |  |  |  |
| 12. | 7c. Experimental Procedure | Is the location of the study procedure provided?                                                                                                                                                                                                                                                                        |  |  |  |
| 13. | 7d. Experimental Procedure | Is the rationale for selecting a specific anesthetic <b>OR</b> surgical approach <b>OR</b> drug dose used provided?                                                                                                                                                                                                     |  |  |  |
| 14. | 8a. Experimental Animal    | Is/are the sex <b>OR</b> age <b>OR</b> weight of the animals provided?                                                                                                                                                                                                                                                  |  |  |  |
| 15. | 8b. Experimental Animal    | Is there any further relevant information about the experimental animal model such as the source of animals <b>OR</b> international strain nomenclature <b>OR</b> genetic modification status (e.g. knock-out or transgenic) <b>OR</b> genotype <b>OR</b> health/immune status <b>OR</b> previous procedures mentioned? |  |  |  |
| 16. | 9a. Housing and Husbandry  | Are the details about type of facility (e.g. specific pathogen free) <b>OR</b> type of cage or housing <b>OR</b> bedding material <b>OR</b> number of cage companions reported?                                                                                                                                         |  |  |  |

|     |                           |                                                                                                                                                                                            |  |  |  |
|-----|---------------------------|--------------------------------------------------------------------------------------------------------------------------------------------------------------------------------------------|--|--|--|
| 17. | 9b. Housing and Husbandry | Are details about breeding program <b>OR</b> light/dark cycle <b>OR</b> temperature <b>OR</b> type of food <b>OR</b> access to food and water <b>OR</b> environmental enrichment provided? |  |  |  |
| 18. | 9c. Housing and Husbandry | Are the welfare-related assessments and interventions that were carried out prior to, during, or after the experiment reported?                                                            |  |  |  |
| 19. | 10a. Sample Size          | Is the total number of animals used in each experiment, <b>AND</b> the number of animals in each experimental group specified?                                                             |  |  |  |
| 20. | 10b. Sample Size          | Is the explanation on sample size calculation <b>OR</b> justification provided?                                                                                                            |  |  |  |
| 21. | 10c. Sample Size          | Is the number of independent replications of each experiment indicated?<br><br>(N/A= If a single procedure was performed)                                                                  |  |  |  |
| 22. | 11a. Allocating Animals   | Is the allocation approach to different study groups <b>OR</b> randomization <b>OR</b> matching mentioned?<br><br>(N/A= If there was a single experimental group)                          |  |  |  |
| 23. | 11b. Allocating Animals   | Is the order in which the animals in the different experimental groups were treated and assessed mentioned?                                                                                |  |  |  |
| 24. | 12. Experimental outcomes | Are the primary and secondary experimental outcomes assessed (e.g. fistula, stricture, etc.) clearly described?                                                                            |  |  |  |

|     |                             |                                                                                                                                                                    |  |  |  |
|-----|-----------------------------|--------------------------------------------------------------------------------------------------------------------------------------------------------------------|--|--|--|
| 25. | 13a. Statistical methods    | Are details about the statistical methods mentioned?                                                                                                               |  |  |  |
| 26. | 13b. Statistical methods    | Is the unit of analysis for each dataset mentioned?                                                                                                                |  |  |  |
| 27. | 13c. Statistical methods    | Are there any methods to assess adequacy of statistical approach utilized?                                                                                         |  |  |  |
| 28. | 14. Baseline data           | Are the relevant characteristics and health status of animals reported? (e.g. weight <b>OR</b> microbiological status <b>OR</b> drug or test naïve)                |  |  |  |
| 29. | 15a. Numbers analysed       | Are the absolute numbers of animals in each group included in each analysis reported?                                                                              |  |  |  |
| 30. | 15b. Numbers analysed       | Is there an explanation on animals or data that were not included in the study?<br><br>(N/A= If a statement about inclusion of all animals was reported)           |  |  |  |
| 31. | 16. Outcomes and estimation | Are the results for each analysis carried out, with a measure of precision (e.g. standard error or confidence interval) reported?                                  |  |  |  |
| 32. | 17a. Adverse events         | Are details of all-important adverse events in each experimental group given?<br><br>(N/A= If a statement about absence of adverse events was reported)            |  |  |  |
| 33. | 17b. Adverse events         | Are modifications to the experimental protocols made to reduce adverse events described?<br><br>(N/A= If a statement about absence of adverse events was reported) |  |  |  |

|     |                                              |                                                                                                                                                                                |  |  |  |
|-----|----------------------------------------------|--------------------------------------------------------------------------------------------------------------------------------------------------------------------------------|--|--|--|
| 34. | 18a. Interpretation/ Scientific Implications | Are the results interpreted, considering the study objectives and hypotheses, current theory and other relevant studies in the literature?                                     |  |  |  |
| 35. | 18b. Interpretation/ Scientific Implications | Is there any comment on the study limitations including any potential sources of bias, any limitations of the animal model, and the imprecision associated with the results?   |  |  |  |
| 36. | 18c. Interpretation/ Scientific Implications | Is there any description on the implications of the experimental methods or findings for the replacement, refinement or reduction (the 3Rs) of the use of animals in research? |  |  |  |
| 37. | 19a. Generalizability/ Translation           | Is there any comment on the translatability of the study findings to other species or systems including relevance to human biology?                                            |  |  |  |
| 38. | 20. Fund                                     | Is there a mention on funding sources?                                                                                                                                         |  |  |  |
