# Supplementary material for: Quality of Reporting in Preclinical Urethral Tissue Engineering Studies: A Systematic Review to Assess Adherence to the ARRIVE Guidelines
Source: Animals (Basel). 2021 Aug 21;11(8):2456. doi: 10.3390/ani11082456 (PMC8388767; doi:10.3390/ani11082456)
Supplement: Supplementary file 1 [file animals-11-02456-s001.zip › File S1.xlsx]

## Sheet: MASTER
ARRIVE item	Qs	Xu, Y(2014)	Wang, F (2014)	Sun, D (2014)	Li H, (2014)	Kajbafzadeh (2014)	Huang, JW (2014)	da Silva, LF (2014)	Wang, DJ (2015)	Rogovaya, OS (2015)	Chun, SY (2015)	Huang, J (2015)	Zhang, K (2015)	Yang L, (2017)	Jiang, S (2017)	Larsson, HM (2018)	Algarrahi, K (2018)	Sa, Y (2018)	Sartoneva, R (2018)	Gunes, M (2015)	Guo, H (2016)	Lv, XiangGuo (2016a)	Pinnagoda, K (2016)	Nikolavsky, D (2016)	Pusateri, CR (2019)	Guo, H (2019)	Hua, X (2019)	Lv, X (2016b)	Li, Y (2017)	YES	NO	N/A	checksum	Score
1. Title	Q1.	YES	YES	YES	YES	YES	YES	YES	YES	YES	YES	YES	YES	YES	YES	YES	YES	YES	YES	YES	YES	YES	YES	YES	YES	YES	YES	YES	YES	28	0	0	28	100
2. Abstract	Q2.	NO	YES	YES	YES	NO	NO	YES	NO	NO	NO	NO	NO	YES	NO	YES	YES	NO	YES	NO	YES	YES	YES	NO	YES	YES	NO	YES	YES	15	13	0	28	53.5714
3a. Background	Q3.	YES	YES	YES	YES	YES	YES	YES	YES	YES	YES	YES	YES	YES	YES	YES	YES	YES	YES	YES	YES	YES	YES	YES	YES	YES	YES	YES	YES	28	0	0	28	100
3b. Background	Q4.	NO	NO	NO	NO	NO	NO	NO	NO	NO	NO	NO	NO	NO	NO	NO	NO	NO	NO	YES	NO	NO	YES	NO	YES	NO	NO	NO	NO	3	25	0	28	10.7143
4. Objective	Q5.	YES	YES	YES	YES	YES	YES	YES	YES	YES	YES	YES	YES	YES	YES	YES	YES	YES	YES	YES	YES	YES	YES	YES	YES	YES	YES	YES	YES	28	0	0	28	100
5. Ethics	Q6	NO	YES	NO	NO	NO	NO	YES	YES	NO	YES	NO	YES	YES	NO	YES	YES	YES	YES	NO	NO	YES	NO	YES	YES	NO	NO	NO	NO	13	15	0	28	46.4286
6a. Study design	Q7.	YES	YES	YES	YES	YES	YES	YES	YES	YES	YES	YES	YES	YES	YES	YES	N/A	YES	YES	YES	N/A	YES	N/A	YES	N/A	N/A	YES	YES	N/A	22	0	6	28	100
6b. Study design	Q8.	NO	YES	NO	NO	YES	YES	NO	YES	NO	YES	YES	NO	YES	NO	NO	YES	YES	NO	NO	YES	YES	N/A	NO	N/A	YES	NO	NO	NO	12	14	2	28	46.1538
6c. Study design	Q9.	NO	NO	NO	NO	NO	NO	NO	NO	NO	NO	NO	NO	NO	NO	NO	NO	NO	NO	NO	NO	NO	NO	NO	NO	NO	NO	NO	NO	0	28	0	28	0
7a. Experimental Procedure	Q10.	YES	YES	YES	YES	YES	YES	YES	YES	YES	YES	YES	YES	YES	YES	YES	YES	NO	YES	YES	YES	YES	YES	YES	YES	YES	YES	YES	YES	27	1	0	28	96.4286
7b. Experimental Procedure	Q11.	YES	NO	NO	NO	NO	NO	NO	NO	NO	NO	NO	NO	NO	NO	NO	NO	NO	NO	NO	NO	NO	NO	NO	NO	NO	NO	NO	NO	1	27	0	28	3.57143
7c. Experimental Procedure	Q12.	YES	NO	YES	NO	NO	NO	NO	NO	NO	NO	NO	NO	NO	NO	NO	NO	NO	YES	NO	NO	NO	NO	NO	NO	YES	NO	NO	NO	4	24	0	28	14.2857
7d. Experimental Procedure	Q13.	YES	NO	NO	NO	NO	NO	NO	NO	NO	NO	NO	NO	NO	NO	NO	NO	NO	NO	NO	NO	NO	NO	NO	NO	NO	NO	NO	NO	1	27	0	28	3.57143
8a. Experimental Animal	Q14.	YES	YES	YES	YES	YES	YES	YES	YES	YES	YES	YES	YES	YES	YES	YES	YES	YES	YES	YES	YES	YES	YES	YES	YES	YES	YES	YES	YES	28	0	0	28	100
8b. Experimental Animal	Q15.	NO	YES	YES	NO	NO	NO	YES	NO	NO	YES	NO	NO	NO	NO	YES	YES	YES	YES	NO	NO	NO	YES	YES	YES	YES	YES	NO	YES	14	14	0	28	50
9a. Housing and Husbandry	Q16.	YES	YES	NO	NO	NO	NO	YES	NO	NO	NO	NO	NO	NO	NO	YES	NO	NO	YES	NO	NO	NO	NO	NO	NO	YES	YES	NO	NO	7	21	0	28	25
9b. Housing and Husbandry	Q17.	YES	YES	NO	NO	NO	NO	YES	NO	NO	NO	NO	NO	NO	NO	YES	NO	NO	NO	NO	NO	NO	NO	NO	NO	NO	YES	NO	NO	5	23	0	28	17.8571
9c. Housing and Husbandry	Q18.	NO	NO	YES	NO	NO	NO	YES	NO	NO	NO	NO	NO	NO	NO	YES	NO	NO	YES	NO	NO	NO	NO	NO	YES	NO	NO	NO	NO	5	23	0	28	17.8571
10a. Sample Size	Q19.	YES	YES	YES	YES	YES	YES	YES	YES	YES	YES	YES	YES	YES	YES	YES	YES	YES	YES	YES	YES	YES	YES	YES	YES	YES	YES	YES	YES	28	0	0	28	100
10b. Sample Size	Q20.	NO	NO	NO	NO	NO	NO	NO	NO	NO	NO	NO	NO	NO	NO	NO	NO	NO	NO	NO	NO	NO	NO	NO	NO	NO	NO	NO	NO	0	28	0	28	0
10c. Sample Size	Q21.	YES	YES	N/A	N/A	N/A	N/A	N/A	N/A	N/A	N/A	N/A	N/A	N/A	N/A	N/A	N/A	N/A	N/A	N/A	N/A	N/A	N/A	N/A	N/A	N/A	N/A	NO	NO	2	2	24	28	50
11a. Allocating Animals	Q22.	YES	YES	YES	NO	YES	YES	NO	YES	NO	YES	YES	NO	YES	NO	N/A	YES	YES	NO	NO	YES	YES	NO	NO	N/A	NO	YES	NO	NO	14	12	2	28	53.8462
11b. Allocating Animals	Q23.	NO	NO	NO	NO	NO	NO	NO	NO	NO	NO	NO	NO	NO	NO	NO	NO	NO	NO	NO	NO	NO	NO	NO	NO	NO	NO	NO	NO	0	28	0	28	0
12. Experimental outcomes	Q24.	YES	YES	YES	YES	YES	YES	YES	YES	YES	YES	YES	YES	YES	YES	YES	YES	NO	YES	YES	YES	YES	YES	YES	YES	YES	YES	YES	YES	27	1	0	28	96.4286
13a. Statistical methods	Q25.	YES	YES	NO	NO	NO	YES	YES	YES	NO	YES	YES	YES	YES	NO	YES	YES	YES	YES	NO	YES	YES	YES	NO	NO	YES	YES	NO	YES	19	9	0	28	67.8571
13b. Statistical methods	Q26.	NO	NO	NO	NO	NO	NO	NO	NO	NO	NO	NO	NO	NO	NO	NO	NO	NO	NO	NO	NO	NO	NO	NO	NO	NO	NO	NO	NO	0	28	0	28	0
13c. Statistical methods	Q27.	NO	NO	NO	NO	NO	NO	NO	NO	NO	NO	NO	NO	NO	NO	NO	NO	NO	NO	NO	NO	NO	NO	NO	NO	NO	NO	NO	NO	0	28	0	28	0
14. Baseline data	Q28.	NO	YES	YES	NO	YES	YES	NO	YES	YES	YES	YES	NO	YES	YES	YES	YES	YES	YES	YES	YES	NO	YES	YES	NO	YES	YES	NO	NO	20	8	0	28	71.4286
15a. Numbers analysed	Q29.	YES	YES	YES	YES	YES	YES	YES	YES	YES	YES	YES	YES	YES	YES	YES	YES	YES	YES	YES	YES	YES	YES	YES	YES	YES	YES	YES	YES	28	0	0	28	100
15b. Numbers analysed	Q30.	N/A	N/A	N/A	NO	N/A	YES	YES	N/A	N/A	N/A	N/A	NO	NO	N/A	YES	YES	NO	YES	N/A	NO	N/A	YES	YES	YES	YES	NO	N/A	N/A	9	6	13	28	60
16. Outcomes and estimation	Q31.	YES	YES	NO	YES	YES	YES	YES	YES	NO	YES	YES	YES	YES	NO	YES	YES	YES	YES	NO	YES	YES	YES	NO	YES	YES	YES	NO	NO	21	7	0	28	75
17a. Adverse events	Q32.	YES	YES	YES	YES	YES	YES	YES	YES	YES	YES	NO	NO	YES	N/A	YES	YES	NO	YES	YES	YES	YES	YES	YES	YES	YES	YES	YES	YES	24	3	1	28	88.8889
17b. Adverse events	Q33.	NO	NO	NO	NO	NO	NO	NO	NO	NO	NO	NO	NO	NO	N/A	NO	NO	NO	NO	NO	NO	NO	NO	NO	NO	NO	NO	NO	N/A	0	26	2	28	0
18a. Interpretation/ Scientific Implications	Q34.	YES	YES	YES	YES	YES	YES	YES	YES	YES	YES	YES	YES	YES	YES	YES	YES	YES	YES	YES	YES	YES	YES	YES	YES	YES	YES	YES	YES	28	0	0	28	100
18b. Interpretation/ Scientific Implications	Q35.	YES	YES	YES	YES	YES	YES	NO	NO	NO	YES	NO	YES	YES	YES	YES	YES	NO	YES	YES	YES	YES	YES	YES	YES	YES	YES	YES	NO	22	6	0	28	78.5714
18c. Interpretation/ Scientific Implications	Q36.	NO	NO	NO	NO	NO	NO	NO	NO	NO	NO	NO	NO	NO	NO	NO	NO	NO	NO	NO	NO	NO	NO	NO	NO	NO	NO	NO	NO	0	28	0	28	0
19a. Generalizability/ Translation	Q37.	YES	YES	YES	YES	YES	YES	YES	YES	YES	YES	YES	NO	YES	YES	YES	YES	YES	YES	YES	YES	YES	YES	YES	YES	YES	YES	NO	YES	26	2	0	28	92.8571
20. Fund	Q38.	YES	YES	YES	YES	YES	YES	YES	YES	NO	YES	YES	YES	YES	YES	YES	YES	NO	YES	YES	YES	YES	YES	NO	YES	YES	YES	YES	YES	25	3	0	28	89.2857
YES		23	25	20	16	18	20	22	19	13	21	17	15	21	14	24	22	16	24	16	19	20	20	17	20	22	21	14	15
No		14	12	16	21	18	17	15	17	23	15	19	22	16	20	12	14	21	13	20	17	16	15	20	14	14	16	23	20
N/A		1	1	2	1	2	1	1	2	2	2	2	1	1	4	2	2	1	1	2	2	2	3	1	4	2	1	1	3
